# Supplementary material for: Distribution and accumulation of dietary ergothioneine and its metabolites in mouse tissues
Source: PubMed Central journal article supplement (PMC5785509; doi:10.1038/s41598-018-20021-z), 2018-01-25

# **Distribution and accumulation of dietary ergothioneine and its metabolites in mouse tissues**

(Supplementary Data)

Richard Ming Yi Tang<sup>1</sup>, Irwin Kee-Mun Cheah<sup>2</sup>, Terry Shze Keong Yew<sup>2</sup>, Barry Halliwel<sup>\*2</sup>

1 National University of Singapore Graduate School for Integrative Sciences and Engineering

2 Department of Biochemistry, Yong Loo Lin School of Medicine,  
National University of Singapore, 28 Medical Drive, Singapore

\* To whom all correspondence should be addressed:

Barry Halliwel;

Centre for Life Sciences,

28 Medical Drive, #04-19A, Singapore 117456

Tel.: +65 65163247

Fax: +65 67773271

E-mail address: [bchbh@nus.edu.sg](mailto:bchbh@nus.edu.sg)

Supplementary Table 1: Statistical analysis of ET uptake in various mouse tissues.

| Kruskal-Wallis test | Significance | Dunn's Post Hoc                                     | Significance    |
|---------------------|--------------|-----------------------------------------------------|-----------------|
| Whole Blood_1D      | ns           | -                                                   | -               |
| Whole Blood_7D      | ****         | Control vs. ET+<br>Control vs. ET++<br>ET+ vs. ET++ | *<br>***<br>ns  |
| Whole Blood_28D     | ****         | Control vs. ET+<br>Control vs. ET++<br>ET+ vs. ET++ | **<br>**<br>ns  |
| Liver_1D            | *            | Control vs. ET+<br>Control vs. ET++<br>ET+ vs. ET++ | ns<br>*<br>ns   |
| Liver_7D            | ***          | Control vs. ET+<br>Control vs. ET++<br>ET+ vs. ET++ | ns<br>***<br>ns |
| Liver_28D           | ***          | Control vs. ET+<br>Control vs. ET++<br>ET+ vs. ET++ | *<br>**<br>ns   |
| Brain_1D            | ns           | -                                                   | -               |
| Brain_7D            | **           | Control vs. ET+<br>Control vs. ET++<br>ET+ vs. ET++ | ns<br>**<br>ns  |
| Brain_28D           | ****         | Control vs. ET+<br>Control vs. ET++<br>ET+ vs. ET++ | *<br>***<br>ns  |
| Eye_1D              | ns           | -                                                   | -               |
| Eye_7D              | ****         | Control vs. ET+<br>Control vs. ET++<br>ET+ vs. ET++ | ns<br>***<br>ns |
| Eye_28D             | ***          | Control vs. ET+<br>Control vs. ET++<br>ET+ vs. ET++ | **<br>**<br>ns  |
| Kidney_1D           | ns           | -                                                   | -               |
| Kidney_7D           | ****         | Control vs. ET+<br>Control vs. ET++<br>ET+ vs. ET++ | *<br>**<br>ns   |
| Kidney_28D          | ***          | Control vs. ET+<br>Control vs. ET++<br>ET+ vs. ET++ | **<br>**<br>ns  |
| Heart_1D            | ns           | -                                                   | -               |
| Heart_7D            | ****         | Control vs. ET+<br>Control vs. ET++<br>ET+ vs. ET++ | **<br>*<br>ns   |
| Heart_28D           | ***          | Control vs. ET+<br>Control vs. ET++<br>ET+ vs. ET++ | **<br>**<br>ns  |
| Spleen_1D           | *            | Control vs. ET+<br>Control vs. ET++<br>ET+ vs. ET++ | ns<br>*<br>ns   |
| Spleen_7D           | *            | Control vs. ET+<br>Control vs. ET++<br>ET+ vs. ET++ | ns<br>*<br>ns   |
| Spleen_28D          | ***          | Control vs. ET+<br>Control vs. ET++<br>ET+ vs. ET++ | *<br>**<br>ns   |
| Lung_1D             | ns           | -                                                   | -               |
| Lung_7D             | *            | Control vs. ET+<br>Control vs. ET++<br>ET+ vs. ET++ | ns<br>*<br>ns   |
| Lung_28D            | **           | Control vs. ET+<br>Control vs. ET++<br>ET+ vs. ET++ | *<br>ns<br>ns   |
| Small Intestine_1D  | ns           | -                                                   | -               |
| Small Intestine_7D  | *            | Control vs. ET+<br>Control vs. ET++<br>ET+ vs. ET++ | ns<br>*<br>ns   |
| Small Intestine_28D | **           | Control vs. ET+<br>Control vs. ET++<br>ET+ vs. ET++ | *<br>*<br>ns    |
| Large Intestine_1D  | *            | Control vs. ET+<br>Control vs. ET++<br>ET+ vs. ET++ | ns<br>*<br>ns   |
| Large Intestine_7D  | ***          | Control vs. ET+<br>Control vs. ET++<br>ET+ vs. ET++ | *<br>**<br>ns   |
| Large Intestine_28D | ****         | Control vs. ET+<br>Control vs. ET++<br>ET+ vs. ET++ | **<br>*<br>ns   |

ns: not significant  $p > 0.05$ ;

\* $p < 0.05$ , \*\* $p < 0.01$ , \*\*\* $p < 0.001$ , \*\*\*\* $p < 0.0001$

Supplementary Table 2: Statistical analysis of frequency-dependent ET uptake in various mouse tissues.

| Mann-Whitney Test       |           | Significance |
|-------------------------|-----------|--------------|
| Whole Blood_Control     | 1D vs. 7D | ns           |
|                         | 7D vs 28D | **           |
| Whole Blood_ET+         | 1D vs. 7D | ***          |
|                         | 7D vs 28D | ***          |
| Whole Blood_ET++        | 1D vs. 7D | ***          |
|                         | 7D vs 28D | ***          |
| Liver_Control           | 1D vs. 7D | ns           |
|                         | 7D vs 28D | p = 0.073    |
| Liver_ET+               | 1D vs. 7D | *            |
|                         | 7D vs 28D | *            |
| Liver_ET++              | 1D vs. 7D | ***          |
|                         | 7D vs 28D | ns           |
| Brain_Control           | 1D vs. 7D | ns           |
|                         | 7D vs 28D | ns           |
| Brain_ET+               | 1D vs. 7D | *            |
|                         | 7D vs 28D | ***          |
| Brain_ET++              | 1D vs. 7D | **           |
|                         | 7D vs 28D | **           |
| Eye_Control             | 1D vs. 7D | ns           |
|                         | 7D vs 28D | p = 0.053    |
| Eye_ET+                 | 1D vs. 7D | ***          |
|                         | 7D vs 28D | **           |
| Eye_ET++                | 1D vs. 7D | ***          |
|                         | 7D vs 28D | ***          |
| Kidney_Control          | 1D vs. 7D | ns           |
|                         | 7D vs 28D | **           |
| Kidney_ET+              | 1D vs. 7D | ***          |
|                         | 7D vs 28D | p = 0.053    |
| Kidney_ET++             | 1D vs. 7D | ***          |
|                         | 7D vs 28D | ns           |
| Heart_Control           | 1D vs. 7D | ns           |
|                         | 7D vs 28D | ns           |
| Heart_ET+               | 1D vs. 7D | ***          |
|                         | 7D vs 28D | *            |
| Heart_ET++              | 1D vs. 7D | **           |
|                         | 7D vs 28D | p = 0.051    |
| Spleen_Control          | 1D vs. 7D | ns           |
|                         | 7D vs 28D | ns           |
| Spleen_ET+              | 1D vs. 7D | **           |
|                         | 7D vs 28D | **           |
| Spleen_ET++             | 1D vs. 7D | **           |
|                         | 7D vs 28D | *            |
| Lung_Control            | 1D vs. 7D | ns           |
|                         | 7D vs 28D | ns           |
| Lung_ET+                | 1D vs. 7D | **           |
|                         | 7D vs 28D | ns           |
| Lung_ET++               | 1D vs. 7D | ***          |
|                         | 7D vs 28D | ns           |
| Small Intestine_Control | 1D vs. 7D | ns           |
|                         | 7D vs 28D | ns           |
| Small Intestine_ET+     | 1D vs. 7D | ns           |
|                         | 7D vs 28D | ns           |
| Small Intestine_ET++    | 1D vs. 7D | *            |
|                         | 7D vs 28D | ns           |
| Large Intestine_Control | 1D vs. 7D | ns           |
|                         | 7D vs 28D | ns           |
| Large Intestine_ET+     | 1D vs. 7D | **           |
|                         | 7D vs 28D | ns           |
| Large Intestine_ET++    | 1D vs. 7D | *            |
|                         | 7D vs 28D | ns           |

ns: not significant  $p > 0.05$ ;

\* $p < 0.05$ , \*\* $p < 0.01$ , \*\*\* $p < 0.001$

Supplementary Table 3: Statistical analysis of dose-dependent ET uptake in various mouse tissues.

| Mann-Whitney Test   |              | Significance |
|---------------------|--------------|--------------|
| Whole Blood_1D      | ET+ vs. ET++ | ns           |
| Whole Blood_7D      | ET+ vs. ET++ | p = 0.073    |
| Whole Blood_28D     | ET+ vs. ET++ | ns           |
| Liver_1D            | ET+ vs. ET++ | *            |
| Liver_7D            | ET+ vs. ET++ | *            |
| Liver_28D           | ET+ vs. ET++ | ns           |
| Brain_1D            | ET+ vs. ET++ | ns           |
| Brain_7D            | ET+ vs. ET++ | ns           |
| Brain_28D           | ET+ vs. ET++ | p = 0.053    |
| Eye_1D              | ET+ vs. ET++ | ns           |
| Eye_7D              | ET+ vs. ET++ | *            |
| Eye_28D             | ET+ vs. ET++ | ns           |
| Kidney_1D           | ET+ vs. ET++ | ns           |
| Kidney_7D           | ET+ vs. ET++ | ns           |
| Kidney_28D          | ET+ vs. ET++ | ns           |
| Heart_1D            | ET+ vs. ET++ | ns           |
| Heart_7D            | ET+ vs. ET++ | ns           |
| Heart_28D           | ET+ vs. ET++ | ns           |
| Spleen_1D           | ET+ vs. ET++ | ns           |
| Spleen_7D           | ET+ vs. ET++ | ns           |
| Spleen_28D          | ET+ vs. ET++ | ns           |
| Lung_1D             | ET+ vs. ET++ | ns           |
| Lung_7D             | ET+ vs. ET++ | p = 0.073    |
| Lung_28D            | ET+ vs. ET++ | ns           |
| Small Intestine_1D  | ET+ vs. ET++ | ns           |
| Small Intestine_7D  | ET+ vs. ET++ | ns           |
| Small Intestine_28D | ET+ vs. ET++ | ns           |
| Large Intestine_1D  | ET+ vs. ET++ | ns           |
| Large Intestine_7D  | ET+ vs. ET++ | ns           |
| Large Intestine_28D | ET+ vs. ET++ | ns           |

ns: not significant  $p > 0.05$ ; \* $p < 0.05$

Supplementary Table 4: Liver and brain ET levels after accounting for tissue blood ET

| <b>Samples</b> | <b>Days of feeding</b> | <b>ET levels</b> | <b>Total tissue ET (ng/mg)</b> | <b>Tissue ET (minus blood ET) (ng/mg)</b> | <b>% change</b> |
|----------------|------------------------|------------------|--------------------------------|-------------------------------------------|-----------------|
| Liver50        | 1                      | Saline           | 88.17                          | 87.11                                     | 1.2%            |
| Liver6         | 1                      | ET+              | 114.68                         | 114.08                                    | 0.5%            |
| Liver10        | 1                      | ET++             | 158.42                         | 157.92                                    | 0.3%            |
| Liver58        | 7                      | Saline           | 83.46                          | 82.50                                     | 1.2%            |
| Liver26        | 7                      | ET+              | 180.76                         | 179.84                                    | 0.5%            |
| Liver17        | 7                      | ET++             | 238.72                         | 237.64                                    | 0.5%            |
| Liver45        | 28                     | Saline           | 80.52                          | 79.50                                     | 1.3%            |
| Liver30        | 28                     | ET+              | 248.03                         | 246.44                                    | 0.6%            |
| Liver34        | 28                     | ET++             | 275.51                         | 273.31                                    | 0.8%            |
| Brain10        | 1                      | ET++             | 3.74                           | 3.53                                      | 5.5%            |
| Brain17        | 7                      | ET++             | 6.61                           | 6.12                                      | 7.4%            |
| Brain34        | 28                     | ET++             | 8.85                           | 8.54                                      | 3.4%            |

Supplementary Data 1: Hemoglobin levels in whole blood. (A) Hemoglobin concentrations for all 63 animals determined by AHD assay. (B) No significant correlation of ET with hemoglobin concentration in whole blood.

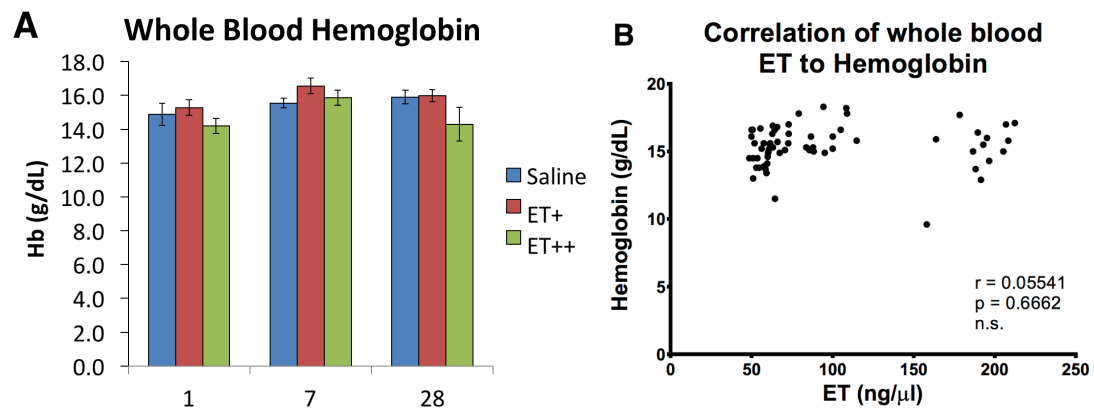

Supplementary Data 2: ET and hercynine levels in tissues after accounting for blood content (n=7). (A-C) Hemoglobin content in all lung, spleen and kidney tissues. (D-I) Lung, spleen, and kidney ET levels were corrected by calculating the amount of blood in the tissues and subtracting the amount of blood ET from the total tissue ET obtained by LC-MS/MS. (J-O) Lung, spleen, and kidney hercynine levels after correcting for blood hercynine contribution. (P) Average percentage changes between total and normalized lung, spleen, and kidney ET and hercynine concentrations.

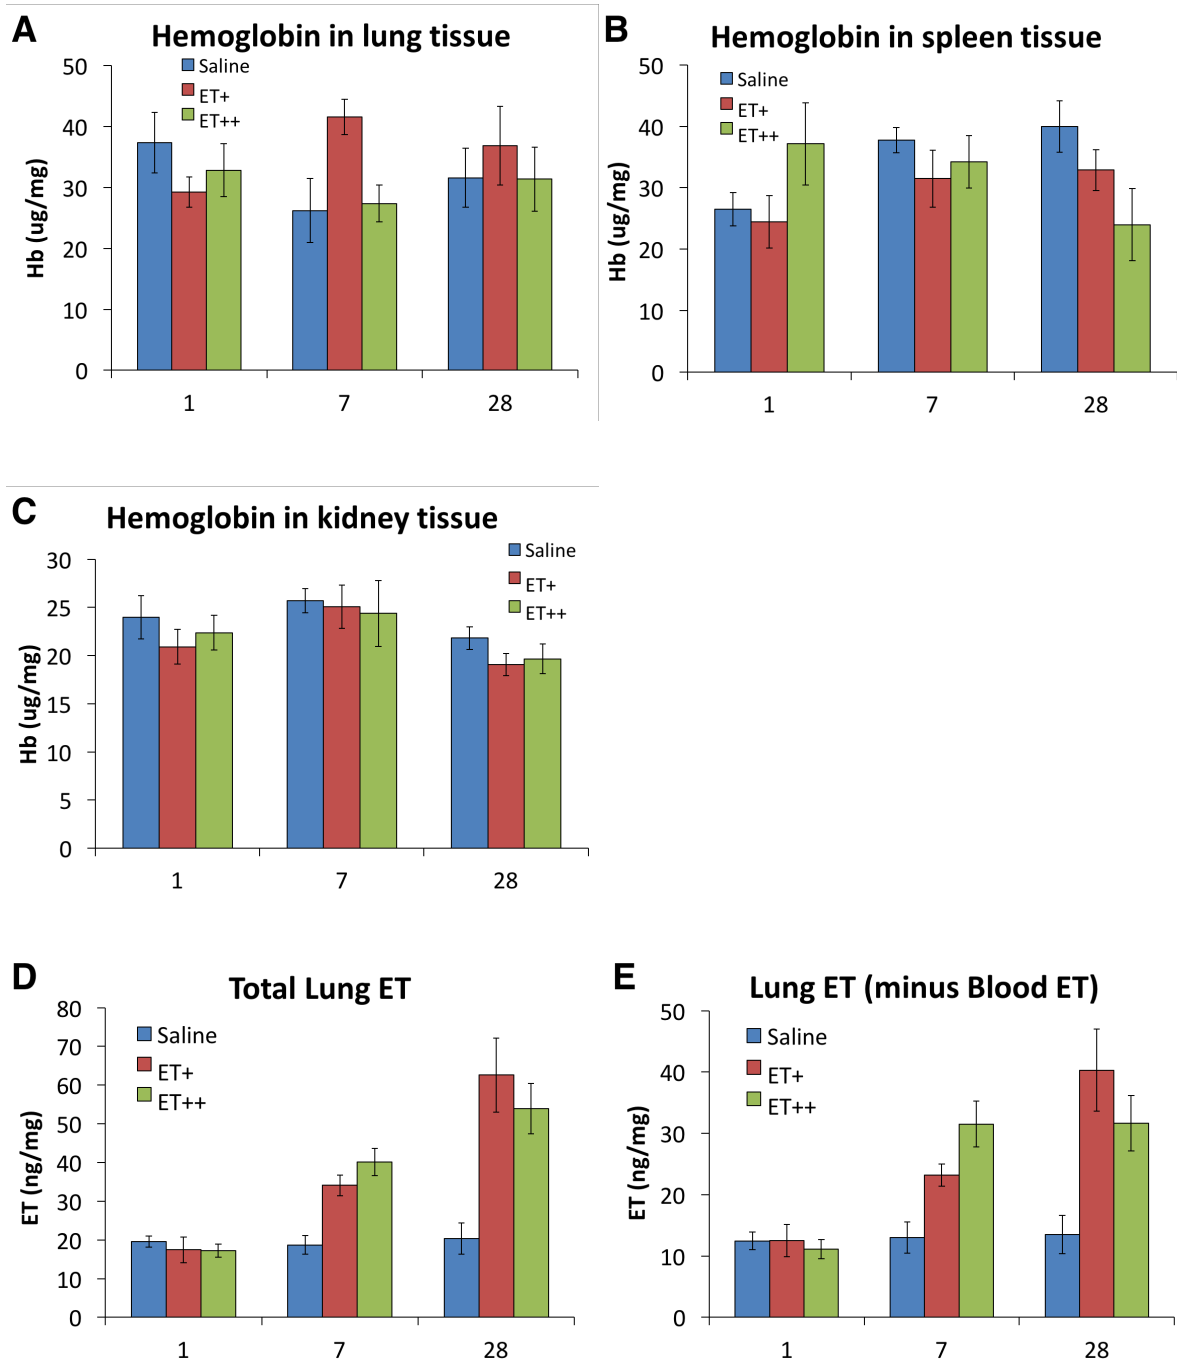

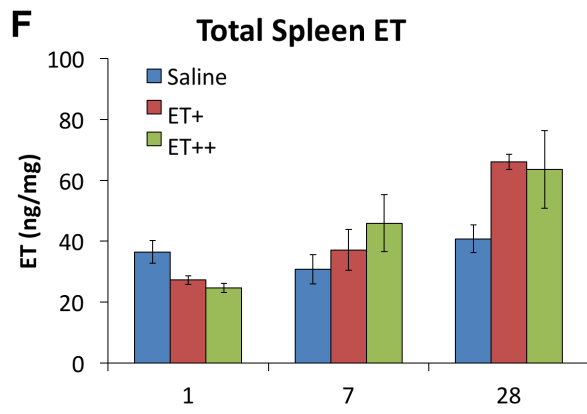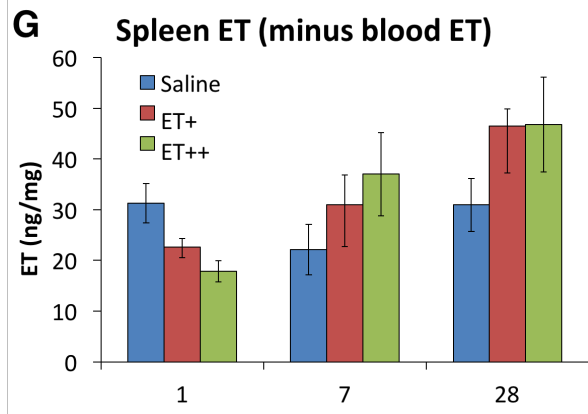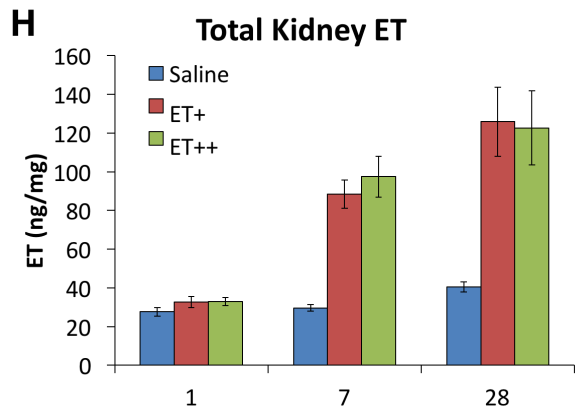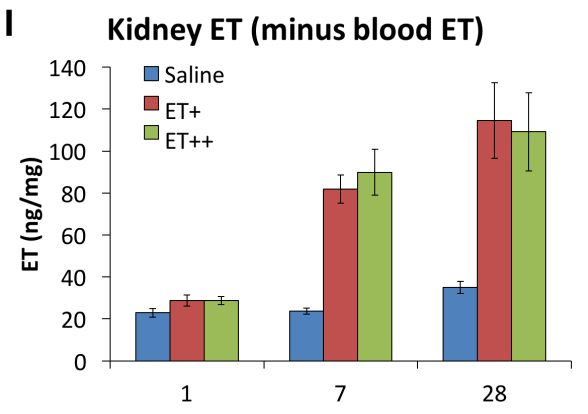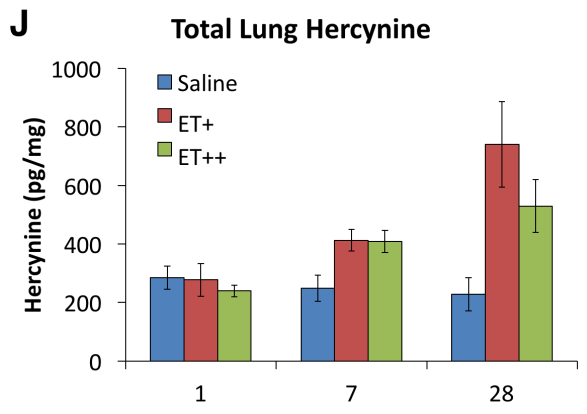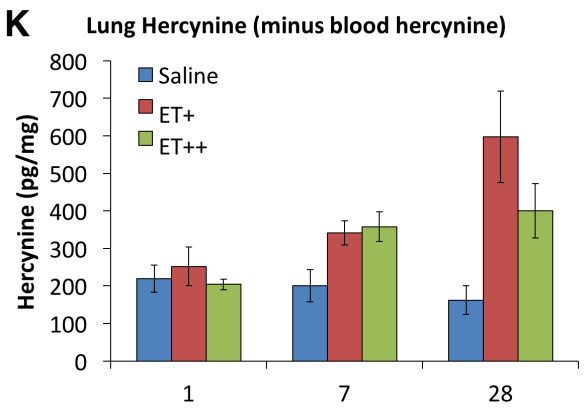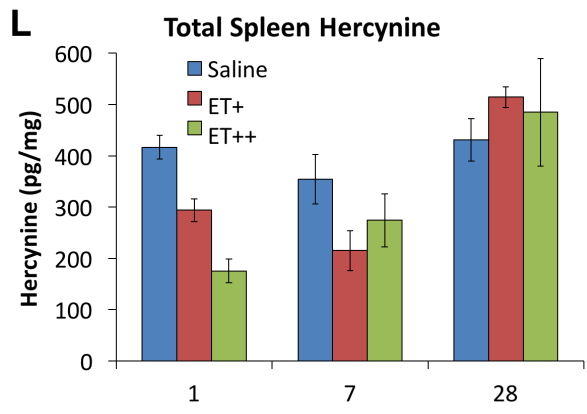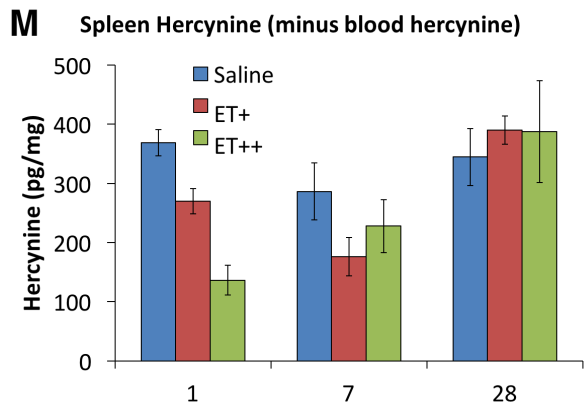



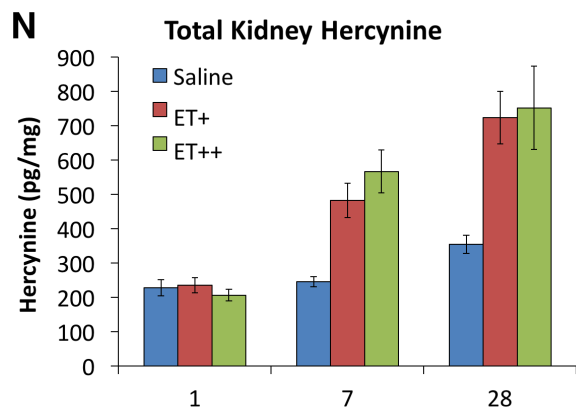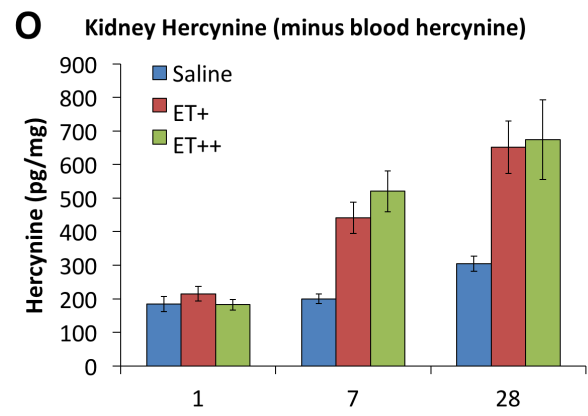

**P**

| Tissues | Percentage change in tissue ET concentration | Percentage change in tissue hercynine |
|---------|----------------------------------------------|---------------------------------------|
| Lung    | 33.2% ± 12.2%                                | 19.4% ± 9.4%                          |
| Spleen  | 23.8% ± 11.5%                                | 18.8% ± 9.3%                          |
| Kidney  | 12.7% ± 5.4%                                 | 12.7% ± 5.5%                          |

Supplementary Data 3: Correlation data between ET and hercynine, ET-SO<sub>3</sub>H and S-methyl ET, and whole blood ET with tissue ET.

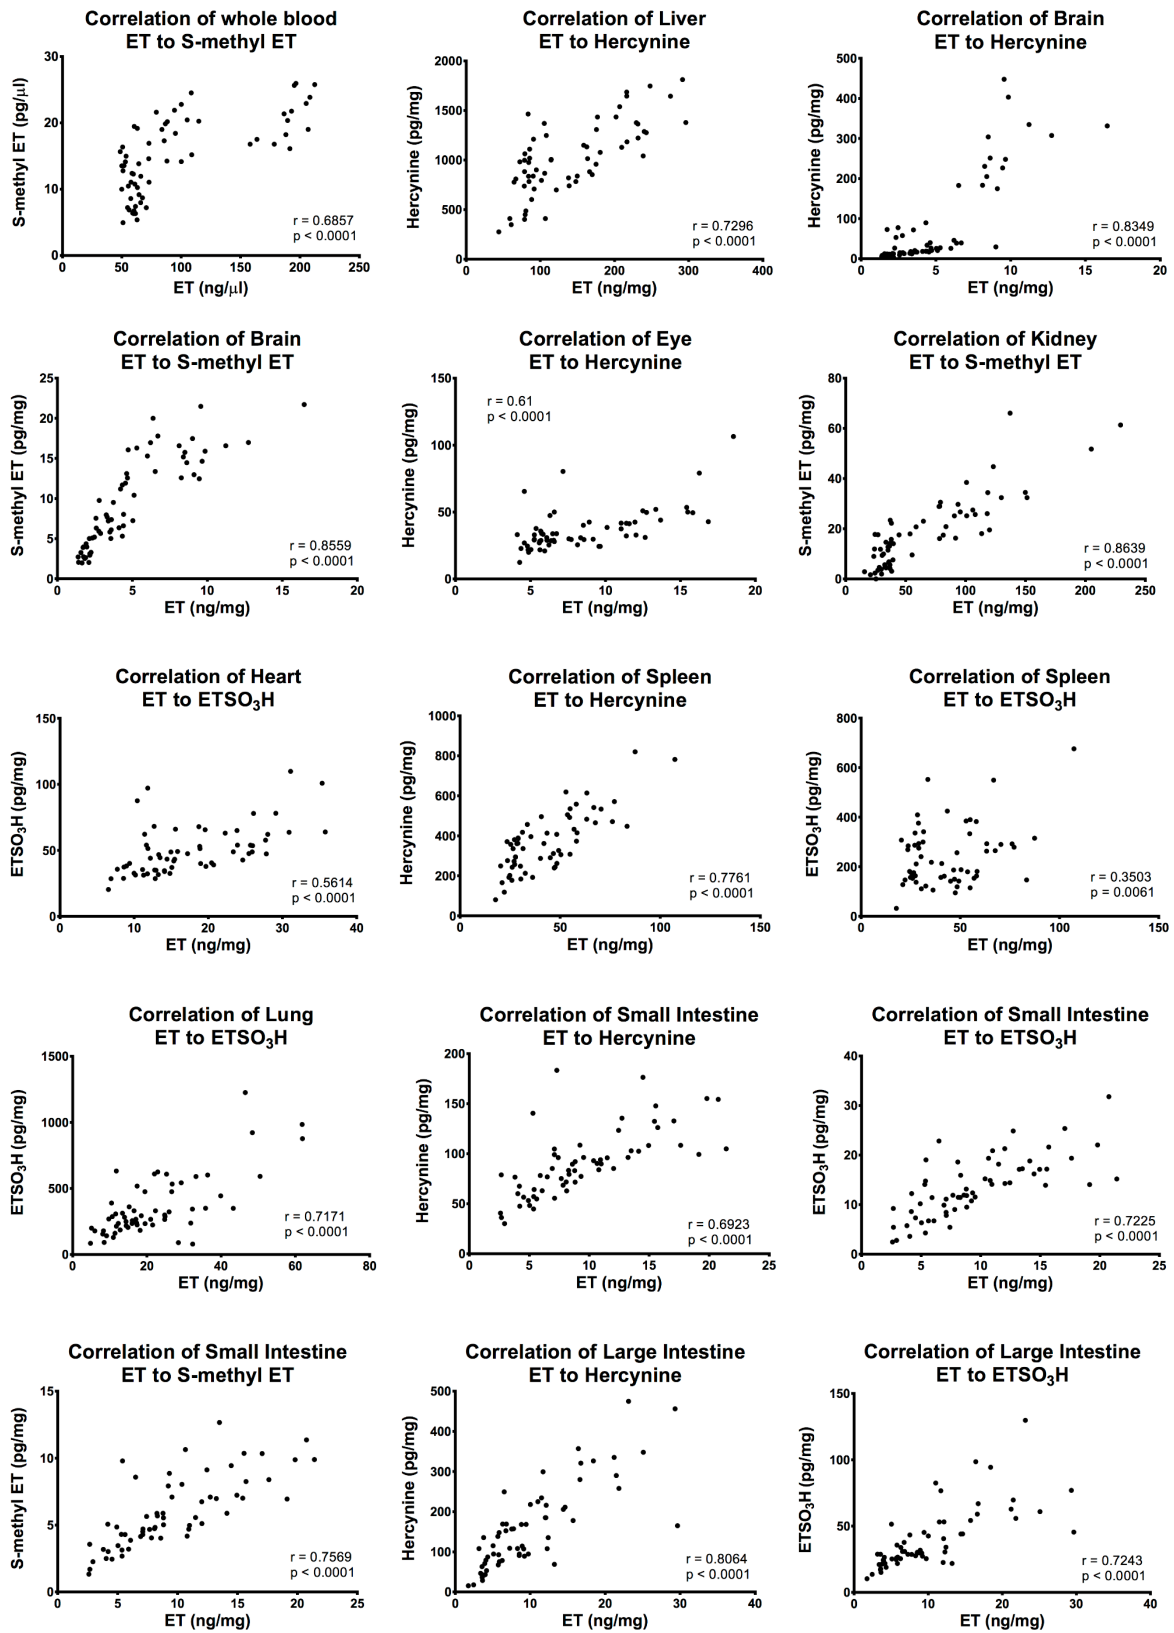

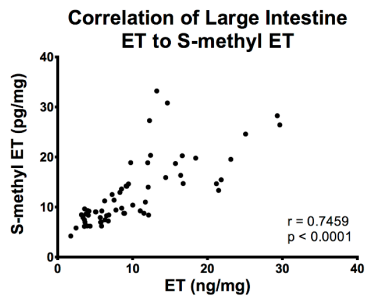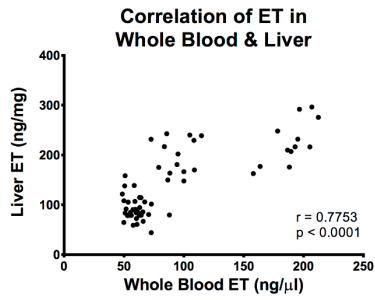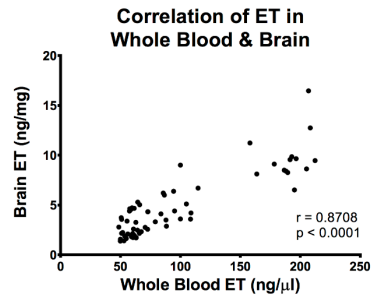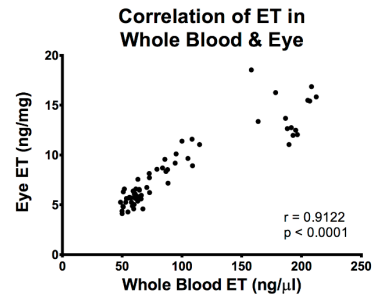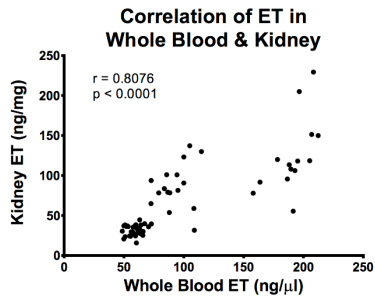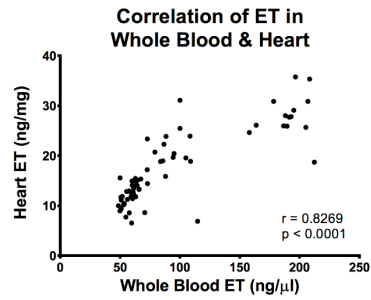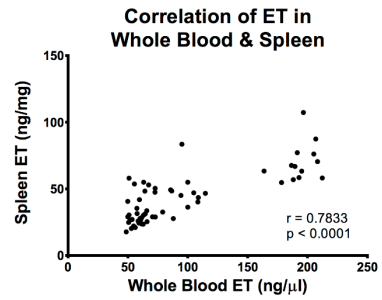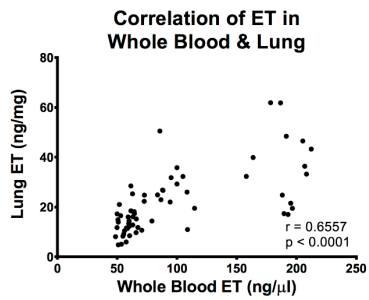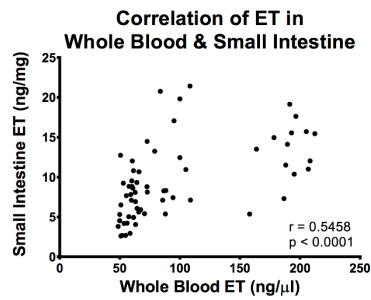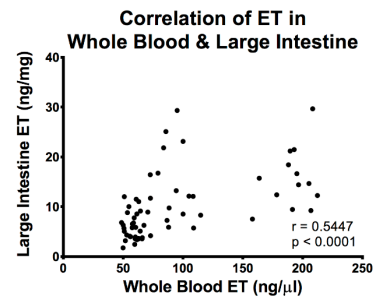

Supplement: 41598_2018_20021_MOESM1_ESM.pdf [file 41598_2018_20021_MOESM1_ESM.pdf]
